# Supplementary material for: Luminal-contact-inhibition of epithelial basal stem cell multipotency in prostate organogenesis and homeostasis
Source: PubMed Central journal article supplement (PMC6826291; doi:10.1242/bio.045724), 2019-09-20
Supplement: biolopen-8-045724-s1.pdf [file biolopen-8-045724-s1.pdf]

## Supplemental Figures and Tables

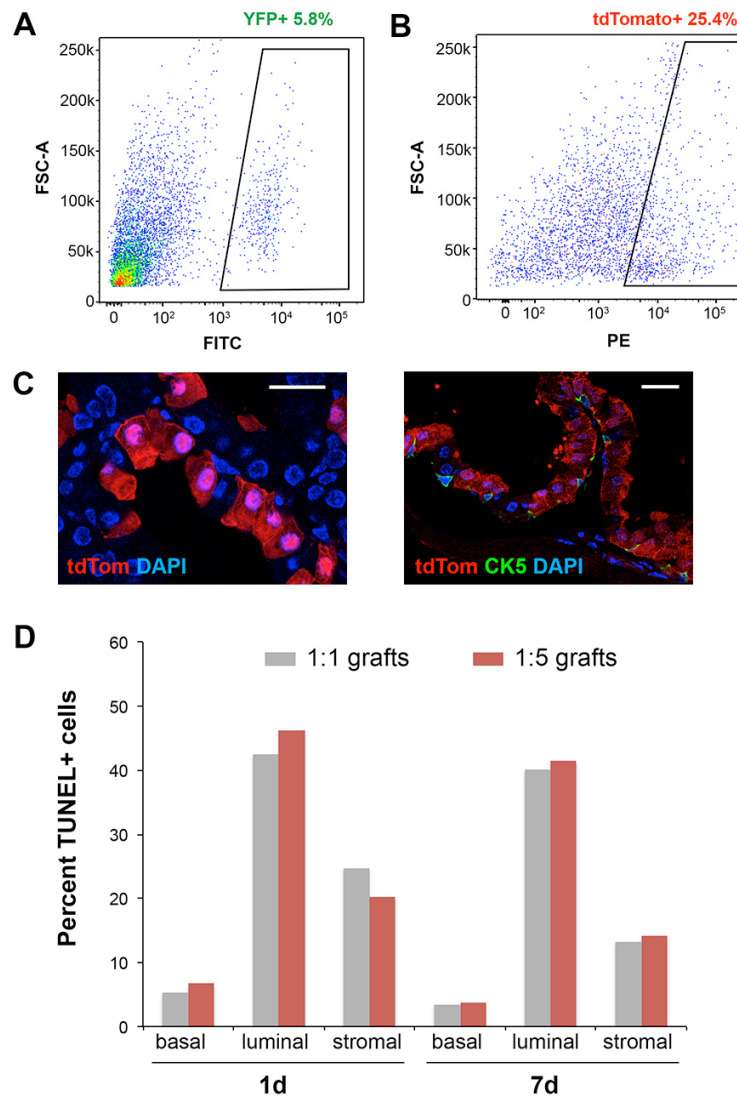

**Figure S1. Sorting basal and luminal cells for renal grafting.** (A, B) FACS gating for YFP<sup>+</sup> basal cells (A) and tdTomato<sup>+</sup> luminal cells (B) from induced *CK5-CreER<sup>T2</sup>; R26R-CAG-YFP/+* mice and *CK18-CreER<sup>T2</sup>; Ai9/+* mice, respectively. (C) Direct visualization of tdTomato and IF staining with CK5 antibody in *CK18-CreER<sup>T2</sup>; Ai9/+* mice showing specific marking of luminal cells after induction. Scale bars, 20 μm. (D) Quantitation of apoptotic cells per cell type for all the 1:1 grafts and 1:5 grafts at 1d and 7d post renal grafting.

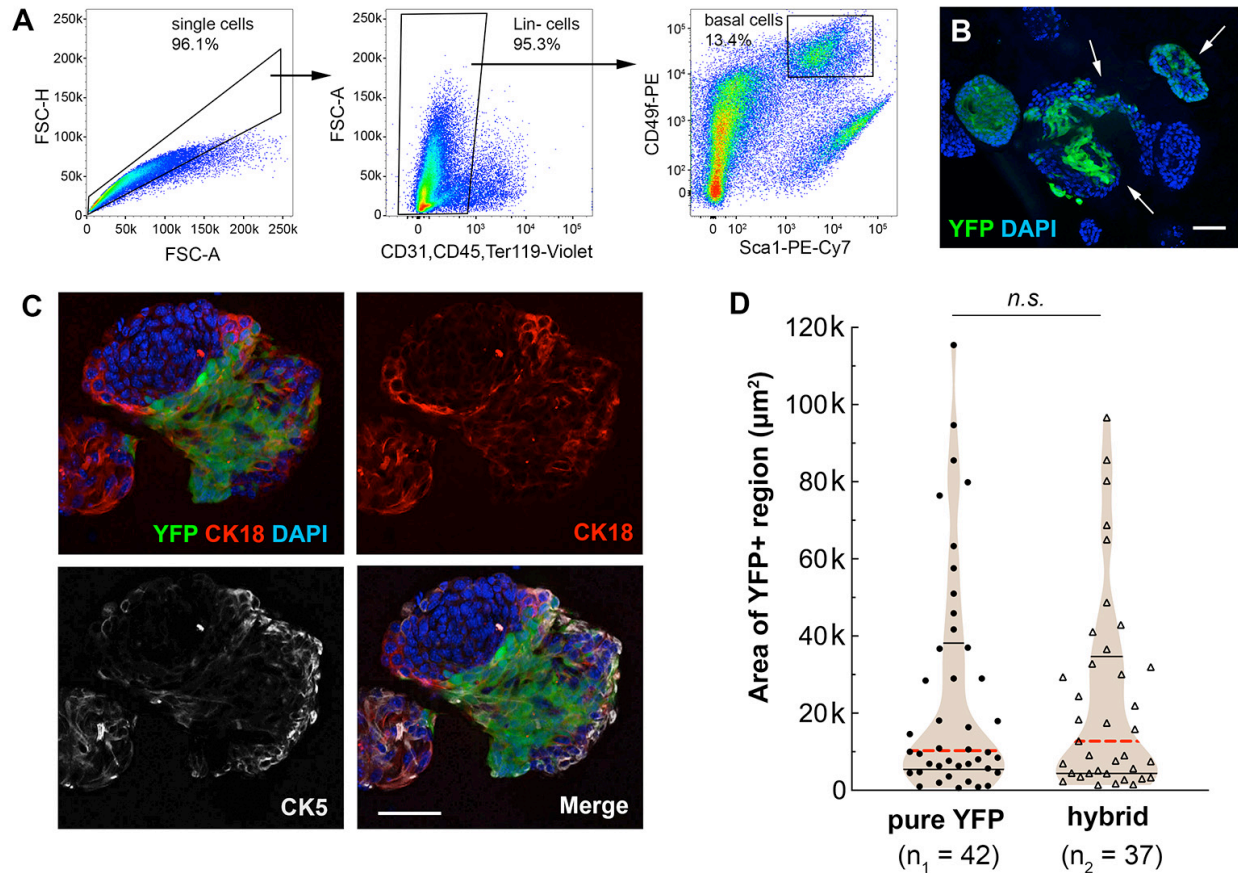

**Figure S2. Organoid assay with mixture of YFP+ basal cells and unmarked basal cells.** (A) FACS gating for sorting average basal cells based on  $\text{Lin}^- \text{Sca-1}^+ \text{Cd49f}^{\text{hi}}$ . (B) Direct visualization of YFP in organoids derived from green and white basal cell mixture. Arrows point to green-white basal hybrid organoids. Scale bar, 50  $\mu\text{m}$ . (C) IF staining showing YFP+ basal cells can differentiate into luminal cells in the hybrid organoids. Scale bar, 50  $\mu\text{m}$ . (D) Violin plot comparing area of YFP+ regions between pure-YFP<sup>+</sup>-basal-derived organoids and hybrid organoids. Black lines, quartiles. Red dashed lines, medians. n.s., not significant by Mann-Whitney U Test.

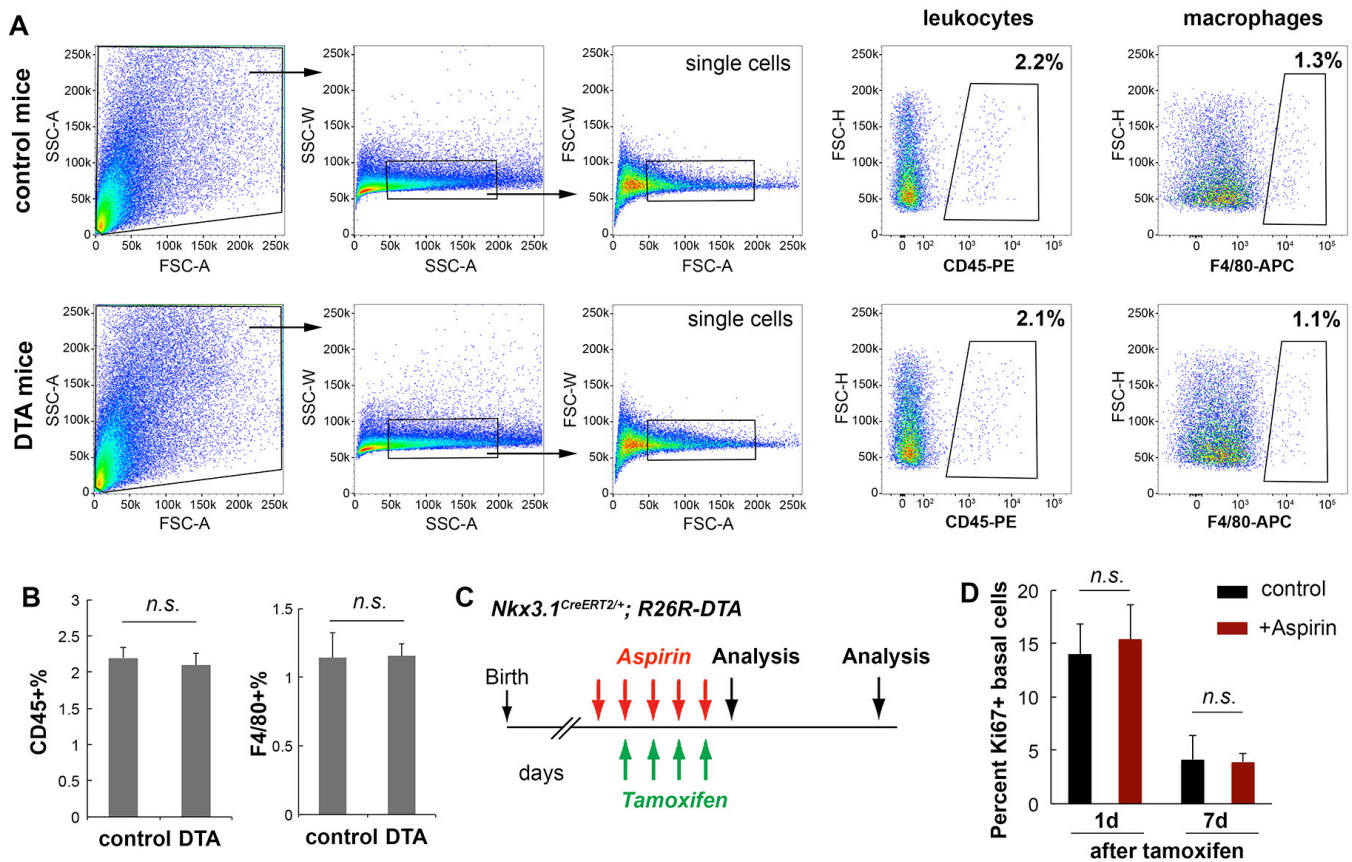

**Figure S3. Testing potential influence of inflammation response on basal cell proliferation.** (A) FACS gating for sorting CD45<sup>+</sup> leukocytes and F4/80<sup>+</sup> macrophages from control un-induced mice and *Nkx3.1<sup>CreERT2/+</sup>; R26R<sup>DTA/+</sup>* mice one day after induction. (B) Quantitation of percentage of leukocytes and macrophages among prostate cells in control and induced *Nkx3.1<sup>CreERT2/+</sup>; R26R<sup>DTA/+</sup>* mice. N=3 biological replicates. n.s., not significant by student's t-test. (C) Timeline of aspirin treatment experiment. (D) Quantitation of percentage of proliferating basal cells showing aspirin treatment had no effect both 1d and 7d after induction. N=3 biological replicates per group. n.s., not significant by student's t-test.

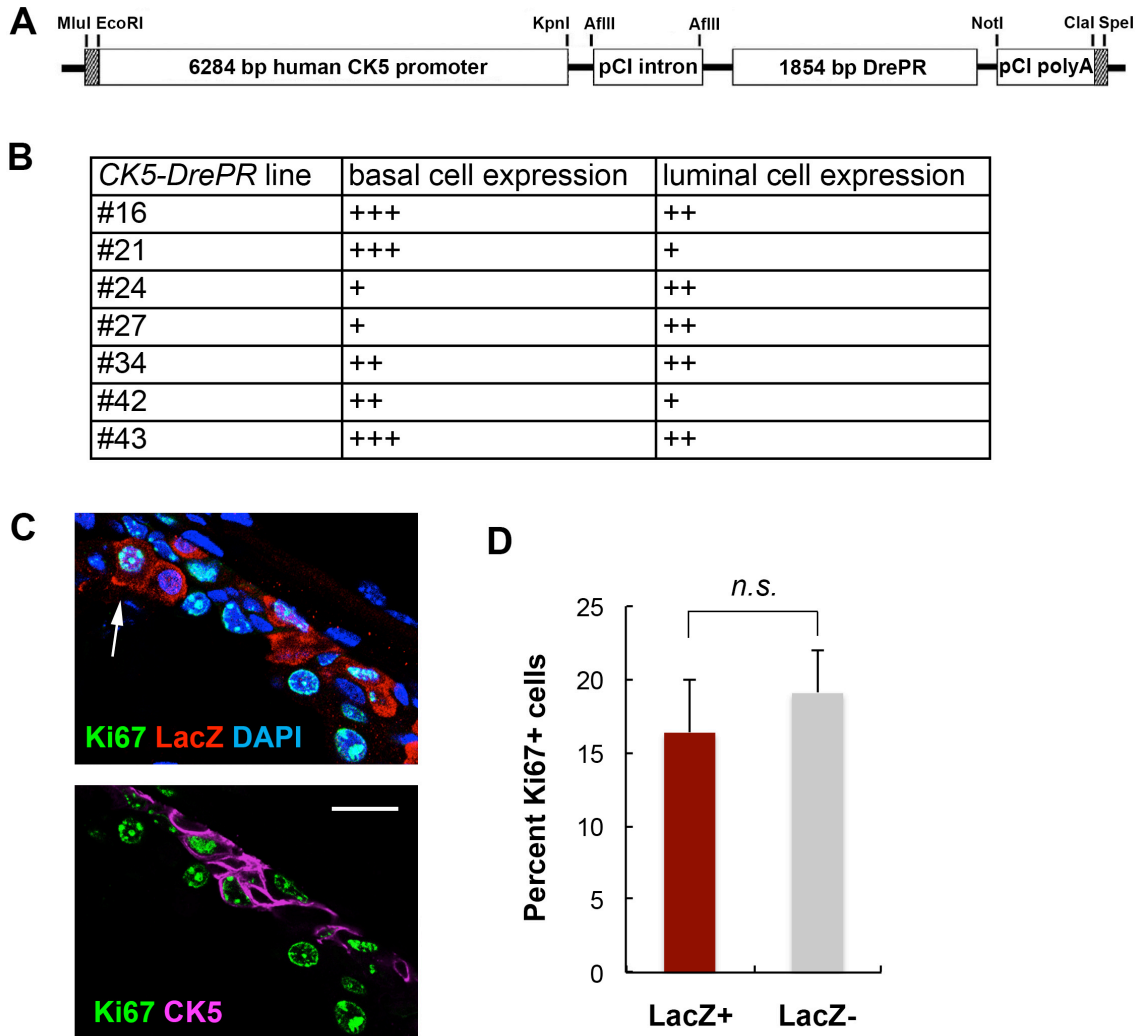

**Figure S4. Generation and characterization of the Dre-rox lineage tracing system.**

(A) Schematic diagram of the *CK5-DrePR* construct for generation of transgenic mice.

(B) Table summary of expression levels in prostate basal and luminal cells for all the *CK5-DrePR* founder lines. “+++”, strong and high-frequency expression; “+”, sporadic expression.

(C) Representative IF image showing presence of Ki67<sup>+</sup> cells in both LacZ<sup>+</sup> (arrow) and LacZ<sup>-</sup> luminal cells 1d after tamoxifen induction in Lum<sup>DTA</sup>; Bas<sup>LacZ</sup> mice. Scale bar, 20 μm.

(D) Quantitation of Ki67 index between the LacZ<sup>+</sup> and LacZ<sup>-</sup> luminal cells. N=3 animals per group. n.s., not significant by student’s t-test.

**Table S1. Primers for mouse genotyping.**

| Allele                       |                   | Primer sequence                 |
|------------------------------|-------------------|---------------------------------|
| <i>CreER<sup>T2</sup></i>    | forward           | 5'-CAGATGGCGCGGCAACACC-3'       |
|                              | reverse           | 5'-GCGCGGTCTGGCAGTAAAAAC-3'     |
|                              | reverse           | 5'-GTCATCTTCACTTAGCCATTGG-3'    |
| <i>R26R-CAG-YFP</i>          | wild-type forward | 5'-AAGGGAGCTGCAGTGGAGTA-3'      |
|                              | wild-type reverse | 5'-CCGAAAATCTGTGGGAAGTC-3'      |
|                              | mutated forward   | 5'-ACATGGTCCTGCTGGAGTTC-3'      |
|                              | mutated reverse   | 5'-GGCATTAAAGCAGCGTATCC-3'      |
| <i>Nkx3.1</i>                | wild-type forward | 5'-CTCCGCTACCCTAAGCATCC-3'      |
|                              | wild-type reverse | 5'-GACACTGTCATATTACTTGGACC-3'   |
| <i>Ai9</i>                   | mutated forward   | 5'-CTGTTCTGTACGGCATGG-3'        |
|                              | mutated reverse   | 5'-GGCATTAAAGCAGCGTATCC-3'      |
| <i>R26R-DTA</i>              | forward           | 5'-AAAGTCGCTCTGAGTTGTTAT-3'     |
|                              | wild-type reverse | 5'-GGAGCGGGAGAAATGGATATG-3'     |
|                              | mutated reverse   | 5'-GCGAAGAGTTTGTCTCAACC-3'      |
| <i>R26-rox-stop-rox-LacZ</i> | forward           | 5'-TGGAAATGTTACCAAGGAACT-3'     |
|                              | wild-type reverse | 5'-GCTTTAAAGAAAGCCCACAG-3'      |
|                              | mutated reverse   | 5'-TGACAGGAGATCCTGCCCCGGCACT-3' |
| <i>DrePR</i>                 | forward           | 5'-CATTACAGCTCGACAGCTC-3'       |
|                              | reverse           | 5'-TGAAGTGGGAGTGGACACCT-3'      |

**Table S2. Antibodies used in this study**

Antibodies for flow cytometry

| Antibody            | Supplier                              | Dilution |
|---------------------|---------------------------------------|----------|
| Sca-1-PE-Cy7        | Biolegend clone E13-161.7 #122513     | 1:500    |
| CD49f-PE            | eBiosciences clone eBioGoH3 #12-0495  | 1:300    |
| Ter119-eFluor450    | eBiosciences clone Ter-119 #48-5921   | 1:250    |
| CD31-eFluor450      | eBiosciences clone 390 #48-0311       | 1:250    |
| CD45-eFluor450      | eBiosciences clone 30-F11 #48-0451    | 1:250    |
| CD45-PE             | eBiosciences clone 30-F11 #12-0451-82 | 1:250    |
| Trop2- Biotinylated | R&D Systems #BAF1122                  | 1:140    |
| APC Streptavidin    | BD #554067                            | 1:140    |
| F4/80-APC           | Biolegend #123115                     | 1:250    |

Primary antibodies used for immunofluorescence staining

| Antigen       | Supplier               | Ig type     | Dilution |
|---------------|------------------------|-------------|----------|
| BrdU          | Serotec #MCA2060       | rat IgG2a   | 1:500    |
| CK5           | Covance #PRB-160P      | rabbit IgG  | 1:1000   |
| CK18          | Abcam #ab668           | mouse IgG1  | 1:100    |
| E-Cadherin    | BD Biosciences #610181 | mouse IgG2a | 1:500    |
| Ki67          | DakoCytomation #M7249  | rat IgG2a   | 1:600    |
| LacZ          | Fisher #PA1-21477      | rabbit IgG  | 1:2000   |
| Synaptophysin | Zymed #18-0130         | rabbit IgG  | 1:500    |
| YFP           | Abcam #13970           | chick IgY   | 1:2000   |
